# Supplementary material
Source: PubMed Central journal article supplement (PMC3260072)
Supplement: supp_111.016634_Supplemental_Tables_12-20-2011.pdf [file supp_111.016634_Supplemental_Tables_12-20-2011.pdf]

**Supplemental Table 1. Rate ratios (RR) and confidence intervals (CI) of IHD mortality by quintile of energy-adjusted flavonoid intake among men and women in the CPS II Nutrition cohort, 1999-2006.**

| <b>Flavonoid</b>             |                                     | <b>Men (n = 38,180)</b> |                        |                                                  | <b>Women (n = 60,289)</b> |                        |                                                  | <b>Men and Women (n = 98,469)<sup>1</sup></b> |                                    |                                                  |
|------------------------------|-------------------------------------|-------------------------|------------------------|--------------------------------------------------|---------------------------|------------------------|--------------------------------------------------|-----------------------------------------------|------------------------------------|--------------------------------------------------|
| <b>Quintile</b>              | <b>Median Intake (Range) (mg/d)</b> | <b>Deaths (n)</b>       | <b>Age-adjusted RR</b> | <b>Multivariate-adjusted RR (CI)<sup>2</sup></b> | <b>Deaths (n)</b>         | <b>Age-adjusted RR</b> | <b>Multivariate-adjusted RR (CI)<sup>2</sup></b> | <b>Deaths (n)</b>                             | <b>Age-adjusted RR<sup>3</sup></b> | <b>Multivariate-adjusted RR (CI)<sup>2</sup></b> |
| <b>Total Flavonoids</b>      |                                     |                         |                        |                                                  |                           |                        |                                                  |                                               |                                    |                                                  |
| 1                            | 94.5 (<121.5)                       | 163                     | 1.00 (-)               | 1.00 (-)                                         | 119                       | 1.00 (-)               | 1.00 (-)                                         | 282                                           | 1.00 (-)                           | 1.00 (-)                                         |
| 2                            | 146.5 (121.4-172.3)                 | 167                     | 0.82 (0.66, 1.02)      | 0.92 (0.74, 1.15)                                | 98                        | 0.81 (0.62, 1.06)      | 0.87 (0.66, 1.14)                                | 265                                           | 0.82 (0.69, 0.97)                  | 0.90 (0.76, 1.07)                                |
| 3                            | 201.9 (172.4-238.0)                 | 171                     | 0.82 (0.66, 1.01)      | 0.96 (0.77, 1.19)                                | 86                        | 0.70 (0.53, 0.92)      | 0.77 (0.58, 1.02)                                | 257                                           | 0.77 (0.65, 0.91)                  | 0.88 (0.74, 1.05)                                |
| 4                            | 286.0 (238.1-359.6)                 | 147                     | 0.68 (0.54, 0.85)      | 0.82 (0.65, 1.03)                                | 84                        | 0.66 (0.50, 0.87)      | 0.73 (0.55, 0.97)                                | 231                                           | 0.67 (0.56, 0.79)                  | 0.78 (0.65, 0.93)                                |
| 5                            | 512.5 (≥359.7)                      | 155                     | 0.75 (0.61, 0.94)      | 0.90 (0.72, 1.13)                                | 96                        | 0.75 (0.58, 0.99)      | 0.84 (0.64, 1.10)                                | 251                                           | 0.75 (0.63, 0.89)                  | 0.87 (0.73, 1.03)                                |
| <i>p</i> -trend <sup>4</sup> |                                     |                         | 0.03                   | 0.4                                              |                           | 0.1                    | 0.3                                              |                                               | 0.005                              | 0.1                                              |
| <b>Anthocyanidin</b>         |                                     |                         |                        |                                                  |                           |                        |                                                  |                                               |                                    |                                                  |
| 1                            | 3.8 (<5.5)                          | 180                     | 1.00 (-)               | 1.00 (-)                                         | 127                       | 1.00 (-)               | 1.00 (-)                                         | 307                                           | 1.00 (-)                           | 1.00 (-)                                         |
| 2                            | 6.8 (5.5-8.1)                       | 131                     | 0.69 (0.55, 0.86)      | 0.78 (0.62, 0.97)                                | 99                        | 0.73 (0.56, 0.95)      | 0.79 (0.61, 1.03)                                | 230                                           | 0.71 (0.59, 0.84)                  | 0.79 (0.66, 0.94)                                |
| 3                            | 9.8 (8.2-11.4)                      | 157                     | 0.73 (0.59, 0.90)      | 0.85 (0.68, 1.05)                                | 97                        | 0.74 (0.57, 0.96)      | 0.83 (0.63, 1.08)                                | 254                                           | 0.73 (0.61, 0.86)                  | 0.83 (0.71, 0.99)                                |
| 4                            | 13.7 (11.5-16.6)                    | 176                     | 0.72 (0.59, 0.89)      | 0.90 (0.73, 1.11)                                | 82                        | 0.65 (0.49, 0.85)      | 0.75 (0.56, 0.99)                                | 258                                           | 0.70 (0.59, 0.82)                  | 0.84 (0.71, 0.99)                                |
| 5                            | 22.2 (≥16.7)                        | 159                     | 0.63 (0.51, 0.78)      | 0.81 (0.65, 1.00)                                | 78                        | 0.69 (0.52, 0.91)      | 0.81 (0.60, 1.07)                                | 237                                           | 0.64 (0.54, 0.76)                  | 0.79 (0.67, 0.94)                                |
| <i>p</i> -trend <sup>4</sup> |                                     |                         | 0.0007                 | 0.2                                              |                           | 0.02                   | 0.2                                              |                                               | <0.0001                            | 0.06                                             |
| <b>Flavan-3-ols</b>          |                                     |                         |                        |                                                  |                           |                        |                                                  |                                               |                                    |                                                  |
| 1                            | 7.0 (<9.5)                          | 165                     | 1.00 (-)               | 1.00 (-)                                         | 126                       | 1.00 (-)               | 1.00 (-)                                         | 291                                           | 1.00 (-)                           | 1.00 (-)                                         |
| 2                            | 11.8 (9.5-14.0)                     | 146                     | 0.76 (0.61, 0.95)      | 0.84 (0.67, 1.06)                                | 101                       | 0.80 (0.62, 1.04)      | 0.88 (0.67, 1.14)                                | 247                                           | 0.78 (0.66, 0.92)                  | 0.86 (0.72, 1.02)                                |
| 3                            | 16.8 (14.1-20.3)                    | 164                     | 0.73 (0.59, 0.91)      | 0.87 (0.70, 1.09)                                | 86                        | 0.74 (0.56, 0.97)      | 0.82 (0.62, 1.09)                                | 250                                           | 0.73 (0.62, 0.87)                  | 0.85 (0.71, 1.00)                                |
| 4                            | 26.3 (20.4-37.1)                    | 164                     | 0.69 (0.56, 0.86)      | 0.85 (0.68, 1.07)                                | 73                        | 0.65 (0.49, 0.87)      | 0.73 (0.55, 0.98)                                | 237                                           | 0.68 (0.57, 0.81)                  | 0.81 (0.68, 0.97)                                |
| 5                            | 63.7 (≥37.2)                        | 164                     | 0.73 (0.59, 0.91)      | 0.87 (0.70, 1.09)                                | 97                        | 0.79 (0.61, 1.03)      | 0.88 (0.67, 1.15)                                | 261                                           | 0.75 (0.64, 0.89)                  | 0.87 (0.74, 1.04)                                |
| <i>p</i> -trend <sup>4</sup> |                                     |                         | 0.1                    | 0.6                                              |                           | 0.3                    | 0.6                                              |                                               | 0.06                               | 0.5                                              |
| <b>Flavanones</b>            |                                     |                         |                        |                                                  |                           |                        |                                                  |                                               |                                    |                                                  |
| 1                            | 3.5 (<7.0)                          | 156                     | 1.00 (-)               | 1.00 (-)                                         | 123                       | 1.00 (-)               | 1.00 (-)                                         | 279                                           | 1.00 (-)                           | 1.00 (-)                                         |
| 2                            | 10.4 (7.0-13.7)                     | 134                     | 0.86 (0.68, 1.08)      | 0.96 (0.76, 1.21)                                | 78                        | 0.62 (0.46, 0.82)      | 0.68 (0.51, 0.90)                                | 212                                           | 0.75 (0.62, 0.89)                  | 0.83 (0.69, 0.99)                                |
| 3                            | 17.4 (13.8-21.2)                    | 157                     | 0.86 (0.69, 1.07)      | 1.03 (0.82, 1.29)                                | 95                        | 0.73 (0.55, 0.95)      | 0.83 (0.63, 1.09)                                | 252                                           | 0.80 (0.68, 0.95)                  | 0.94 (0.79, 1.12)                                |
| 4                            | 27.3 (21.7-35.3)                    | 171                     | 0.87 (0.70, 1.08)      | 1.04 (0.84, 1.30)                                | 88                        | 0.66 (0.50, 0.86)      | 0.77 (0.58, 1.02)                                | 259                                           | 0.78 (0.66, 0.92)                  | 0.92 (0.78, 1.09)                                |
| 5                            | 49.9 (≥35.4)                        | 185                     | 0.81 (0.65, 1.00)      | 0.98 (0.79, 1.22)                                | 99                        | 0.70 (0.54, 0.92)      | 0.80 (0.61, 1.05)                                | 284                                           | 0.76 (0.64, 0.89)                  | 0.89 (0.76, 1.06)                                |
| <i>p</i> -trend <sup>4</sup> |                                     |                         | 0.1                    | 1.0                                              |                           | 0.09                   | 0.4                                              |                                               | 0.02                               | 0.5                                              |
| <b>Flavones</b>              |                                     |                         |                        |                                                  |                           |                        |                                                  |                                               |                                    |                                                  |
| 1                            | 0.4 (<0.5)                          | 193                     | 1.00 (-)               | 1.00 (-)                                         | 130                       | 1.00 (-)               | 1.00 (-)                                         | 323                                           | 1.00 (-)                           | 1.00 (-)                                         |
| 2                            | 0.7 (0.5-0.8)                       | 171                     | 0.98 (0.80, 1.20)      | 1.08 (0.88, 1.33)                                | 104                       | 0.81 (0.62, 1.04)      | 0.88 (0.68, 1.15)                                | 275                                           | 0.90 (0.76, 1.05)                  | 0.99 (0.84, 1.16)                                |
| 3                            | 1.1 (0.9-1.2)                       | 156                     | 0.85 (0.69, 1.05)      | 0.99 (0.80, 1.23)                                | 96                        | 0.75 (0.58, 0.98)      | 0.85 (0.65, 1.11)                                | 252                                           | 0.80 (0.67, 0.94)                  | 0.91 (0.77, 1.08)                                |
| 4                            | 1.6 (1.3-2.0)                       | 147                     | 0.79 (0.64, 0.99)      | 0.96 (0.77, 1.19)                                | 95                        | 0.74 (0.57, 0.97)      | 0.86 (0.66, 1.13)                                | 242                                           | 0.77 (0.65, 0.91)                  | 0.91 (0.77, 1.08)                                |
| 5                            | 3.0 (≥2.1)                          | 136                     | 0.71 (0.57, 0.88)      | 0.87 (0.70, 1.09)                                | 58                        | 0.51 (0.37, 0.69)      | 0.60 (0.44, 0.82)                                | 194                                           | 0.62 (0.52, 0.74)                  | 0.75 (0.62, 0.90)                                |
| <i>p</i> -trend <sup>4</sup> |                                     |                         | 0.0006                 | 0.1                                              |                           | <0.0001                | 0.002                                            |                                               | <0.0001                            | 0.0009                                           |

**Supplemental Table 1 (continued). Rate ratios (RR) and confidence intervals (CI) of IHD mortality by quintile of energy-adjusted flavonoid intake among men and women in the CPS II Nutrition cohort, 1999-2006.**

| Flavonoid                    | Men (n = 38,180)    |                              |                   | Women (n = 60,289) |                                            |                   | Men and Women (n = 98,469) <sup>1</sup> |                                            |                   |                              |                                            |
|------------------------------|---------------------|------------------------------|-------------------|--------------------|--------------------------------------------|-------------------|-----------------------------------------|--------------------------------------------|-------------------|------------------------------|--------------------------------------------|
|                              | Quintile            | Median Intake (Range) (mg/d) | Deaths (n)        | Age-adjusted RR    | Multivariate-adjusted RR (CI) <sup>2</sup> | Deaths (n)        | Age-adjusted RR                         | Multivariate-adjusted RR (CI) <sup>2</sup> | Deaths (n)        | Age-adjusted RR <sup>3</sup> | Multivariate-adjusted RR (CI) <sup>2</sup> |
| Flavonols                    |                     |                              |                   |                    |                                            |                   |                                         |                                            |                   |                              |                                            |
| 1                            | 6.9 (<8.5)          | 167                          | 1.00 (-)          | 1.00 (-)           | 144                                        | 1.00 (-)          | 1.00 (-)                                | 311                                        | 1.00 (-)          | 1.00 (-)                     |                                            |
| 2                            | 9.9 (8.5-11.3)      | 173                          | 0.87 (0.71, 1.08) | 0.97 (0.78, 1.20)  | 82                                         | 0.59 (0.45, 0.78) | 0.64 (0.49, 0.84)                       | 255                                        | 0.75 (0.63, 0.88) | 0.82 (0.69, 0.97)            |                                            |
| 3                            | 13.0 (11.4-14.7)    | 164                          | 0.80 (0.64, 0.99) | 0.93 (0.74, 1.15)  | 98                                         | 0.75 (0.58, 0.97) | 0.82 (0.63, 1.06)                       | 262                                        | 0.76 (0.65, 0.90) | 0.86 (0.73, 1.02)            |                                            |
| 4                            | 17.2 (14.8-20.5)    | 144                          | 0.71 (0.57, 0.89) | 0.85 (0.67, 1.06)  | 73                                         | 0.54 (0.41, 0.72) | 0.61 (0.46, 0.81)                       | 217                                        | 0.63 (0.53, 0.76) | 0.74 (0.62, 0.88)            |                                            |
| 5                            | 27.2 (≥20.6)        | 155                          | 0.83 (0.67, 1.04) | 0.98 (0.78, 1.22)  | 86                                         | 0.64 (0.49, 0.84) | 0.72 (0.55, 0.94)                       | 241                                        | 0.74 (0.63, 0.88) | 0.85 (0.72, 1.01)            |                                            |
| <i>p</i> -trend <sup>4</sup> |                     |                              | 0.1               | 0.8                |                                            | 0.007             | 0.05                                    |                                            | 0.003             | 0.1                          |                                            |
| Proanthocyanidins            |                     |                              |                   |                    |                                            |                   |                                         |                                            |                   |                              |                                            |
| 1                            | 53.1 (<71.6)        | 151                          | 1.00 (-)          | 1.00 (-)           | 117                                        | 1.00 (-)          | 1.00 (-)                                | 268                                        | 1.00 (-)          | 1.00 (-)                     |                                            |
| 2                            | 90.0 (71.6-109.2)   | 185                          | 1.08 (0.87, 1.34) | 1.20 (0.97, 1.49)  | 101                                        | 0.83 (0.64, 1.09) | 0.88 (0.67, 1.15)                       | 286                                        | 0.98 (0.83, 1.15) | 1.07 (0.90, 1.26)            |                                            |
| 3                            | 132.0 (109.3-160.2) | 171                          | 0.95 (0.76, 1.18) | 1.08 (0.87, 1.35)  | 80                                         | 0.65 (0.49, 0.87) | 0.71 (0.53, 0.94)                       | 251                                        | 0.82 (0.69, 0.98) | 0.92 (0.77, 1.09)            |                                            |
| 4                            | 196.8 (160.3-253.5) | 145                          | 0.80 (0.64, 1.01) | 0.94 (0.75, 1.19)  | 86                                         | 0.68 (0.51, 0.90) | 0.74 (0.55, 0.97)                       | 231                                        | 0.75 (0.63, 0.89) | 0.85 (0.71, 1.01)            |                                            |
| 5                            | 379.4 (≥253.6)      | 151                          | 0.89 (0.71, 1.11) | 1.03 (0.82, 1.29)  | 99                                         | 0.77 (0.59, 1.01) | 0.84 (0.64, 1.10)                       | 250                                        | 0.83 (0.70, 0.99) | 0.94 (0.79, 1.12)            |                                            |
| <i>p</i> -trend <sup>4</sup> |                     |                              | 0.08              | 0.5                |                                            | 0.2               | 0.4                                     |                                            | 0.02              | 0.2                          |                                            |
| Isoflavones                  |                     |                              |                   |                    |                                            |                   |                                         |                                            |                   |                              |                                            |
| 1                            | 0.024 (<0.027)      | 128                          | 1.00 (-)          | 1.00 (-)           | 111                                        | 1.00 (-)          | 1.00 (-)                                | 239                                        | 1.00 (-)          | 1.00 (-)                     |                                            |
| 2                            | 0.029 (0.027-0.031) | 148                          | 0.87 (0.69, 1.11) | 0.90 (0.71, 1.15)  | 113                                        | 1.17 (0.90, 1.53) | 1.20 (0.92, 1.56)                       | 261                                        | 1.01 (0.85, 1.21) | 1.04 (0.87, 1.25)            |                                            |
| 3                            | 0.036 (0.032-0.041) | 192                          | 0.91 (0.72, 1.14) | 0.96 (0.76, 1.20)  | 117                                        | 1.31 (1.01, 1.71) | 1.35 (1.04, 1.76)                       | 309                                        | 1.08 (0.91, 1.28) | 1.13 (0.95, 1.34)            |                                            |
| 4                            | 0.055 (0.042-0.141) | 214                          | 0.76 (0.61, 0.95) | 0.79 (0.64, 0.99)  | 70                                         | 1.01 (0.75, 1.37) | 1.02 (0.75, 1.37)                       | 284                                        | 0.87 (0.73, 1.04) | 0.90 (0.75, 1.07)            |                                            |
| 5                            | 0.713 (≥0.142)      | 121                          | 0.64 (0.50, 0.83) | 0.76 (0.59, 0.98)  | 72                                         | 0.92 (0.68, 1.24) | 1.06 (0.78, 1.43)                       | 193                                        | 0.76 (0.63, 0.92) | 0.88 (0.73, 1.07)            |                                            |
| <i>p</i> -trend <sup>4</sup> |                     |                              | 0.002             | 0.09               |                                            | 0.1               | 0.6                                     |                                            | 0.0008            | 0.08                         |                                            |

<sup>1</sup>No heterogeneity in RRs by sex, tested using Likelihood Ratio Tests of models with and without an interaction term of flavonoid/s (quintiles) and sex.

<sup>2</sup>Multivariate model adjusted for age, smoking, beer and liquor intake, history of hypertension, history of cholesterol, family history of myocardial infarction, BMI, physical activity, energy intake, aspirin use, hormone replacement therapy (in women only), and gender (in combined model only) using Cox Proportional Hazards regression.

<sup>3</sup>Age-adjusted models for men and women combined were additionally adjusted for sex.

<sup>4</sup>Test for trend using median value for each quintile and modeling as a continuous variable.

**Supplemental Table 2. Rate ratios (RR) and confidence intervals (CI) of stroke mortality by quartile of energy-adjusted flavonoid intake among men and women in the CPS II Nutrition cohort, 1999-2006.**

| <b>Flavonoid</b> |                                     | <b>Men (n = 38,180)</b> |                        |                                                  | <b>Women (n = 60,289)</b> |                        |                                                  | <b>Men and Women (n = 98,469)<sup>1</sup></b> |                                    |                                                  |
|------------------|-------------------------------------|-------------------------|------------------------|--------------------------------------------------|---------------------------|------------------------|--------------------------------------------------|-----------------------------------------------|------------------------------------|--------------------------------------------------|
| <b>Quartile</b>  | <b>Median Intake (Range) (mg/d)</b> | <b>Deaths (n)</b>       | <b>Age-adjusted RR</b> | <b>Multivariate-adjusted RR (CI)<sup>2</sup></b> | <b>Deaths (n)</b>         | <b>Age-adjusted RR</b> | <b>Multivariate-adjusted RR (CI)<sup>2</sup></b> | <b>Deaths (n)</b>                             | <b>Age-adjusted RR<sup>3</sup></b> | <b>Multivariate-adjusted RR (CI)<sup>2</sup></b> |
| Total Flavonoids |                                     |                         |                        |                                                  |                           |                        |                                                  |                                               |                                    |                                                  |
| 1                | 102.0 (<134.3)                      | 79                      | 1.00 (-)               | 1.00 (-)                                         | 85                        | 1.00 (-)               | 1.00 (-)                                         | 164                                           | 1.00 (-)                           | 1.00 (-)                                         |
| 2                | 165.7 (134.3-201.8)                 | 63                      | 0.65 (0.46, 0.90)      | 0.69 (0.49, 0.96)                                | 54                        | 0.65 (0.46, 0.91)      | 0.70 (0.50, 0.99)                                | 117                                           | 0.65 (0.52, 0.83)                  | 0.70 (0.55, 0.89)                                |
| 3                | 248.8 (201.9-318.5)                 | 82                      | 0.80 (0.59, 1.09)      | 0.87 (0.63, 1.19)                                | 69                        | 0.79 (0.57, 1.08)      | 0.87 (0.63, 1.20)                                | 151                                           | 0.80 (0.64, 1.00)                  | 0.88 (0.70, 1.10)                                |
| 4                | 458.5 (≥318.6)                      | 57                      | 0.59 (0.42, 0.83)      | 0.63 (0.44, 0.89)                                | 84                        | 0.91 (0.67, 1.24)      | 1.02 (0.75, 1.38)                                | 141                                           | 0.75 (0.60, 0.94)                  | 0.83 (0.66, 1.04)                                |
|                  | <i>p</i> -trend <sup>4</sup>        |                         | 0.02                   | 0.04                                             |                           | 0.8                    | 0.4                                              |                                               | 0.2                                | 0.5                                              |
| Anthocyanidin    |                                     |                         |                        |                                                  |                           |                        |                                                  |                                               |                                    |                                                  |
| 1                | 4.3 (<6.2)                          | 64                      | 1.00 (-)               | 1.00 (-)                                         | 84                        | 1.00 (-)               | 1.00 (-)                                         | 148                                           | 1.00 (-)                           | 1.00 (-)                                         |
| 2                | 7.9 (6.2-9.7)                       | 73                      | 1.02 (0.73, 1.43)      | 1.10 (0.78, 1.55)                                | 69                        | 0.80 (0.58, 1.11)      | 0.88 (0.64, 1.21)                                | 142                                           | 0.90 (0.71, 1.13)                  | 0.97 (0.77, 1.22)                                |
| 3                | 12.0 (9.8-14.9)                     | 79                      | 0.98 (0.70, 1.36)      | 1.08 (0.77, 1.51)                                | 70                        | 0.83 (0.60, 1.14)      | 0.94 (0.68, 1.30)                                | 149                                           | 0.90 (0.71, 1.13)                  | 1.01 (0.80, 1.28)                                |
| 4                | 20.4 (≥15.0)                        | 65                      | 0.74 (0.52, 1.04)      | 0.84 (0.59, 1.20)                                | 69                        | 0.91 (0.66, 1.25)      | 1.05 (0.76, 1.46)                                | 134                                           | 0.81 (0.64, 1.03)                  | 0.95 (0.75, 1.20)                                |
|                  | <i>p</i> -trend <sup>4</sup>        |                         | 0.05                   | 0.2                                              |                           | 0.8                    | 0.6                                              |                                               | 0.1                                | 0.7                                              |
| Flavan-3-ols     |                                     |                         |                        |                                                  |                           |                        |                                                  |                                               |                                    |                                                  |
| 1                | 7.7 (<10.6)                         | 64                      | 1.00 (-)               | 1.00 (-)                                         | 86                        | 1.00 (-)               | 1.00 (-)                                         | 150                                           | 1.00 (-)                           | 1.00 (-)                                         |
| 2                | 13.5 (10.6-16.7)                    | 78                      | 1.01 (0.72, 1.40)      | 1.11 (0.80, 1.55)                                | 73                        | 0.89 (0.65, 1.21)      | 0.97 (0.71, 1.33)                                | 151                                           | 0.95 (0.75, 1.19)                  | 1.04 (0.83, 1.30)                                |
| 3                | 21.6 (16.8-30.7)                    | 77                      | 0.86 (0.62, 1.20)      | 0.99 (0.70, 1.39)                                | 62                        | 0.82 (0.59, 1.14)      | 0.91 (0.66, 1.27)                                | 139                                           | 0.85 (0.67, 1.07)                  | 0.96 (0.76, 1.22)                                |
| 4                | 54.3 (≥30.8)                        | 62                      | 0.74 (0.52, 1.04)      | 0.84 (0.58, 1.20)                                | 71                        | 0.84 (0.61, 1.15)      | 0.94 (0.68, 1.29)                                | 133                                           | 0.80 (0.63, 1.01)                  | 0.90 (0.71, 1.14)                                |
|                  | <i>p</i> -trend <sup>4</sup>        |                         | 0.05                   | 0.2                                              |                           | 0.4                    | 0.7                                              |                                               | 0.06                               | 0.2                                              |
| Flavanones       |                                     |                         |                        |                                                  |                           |                        |                                                  |                                               |                                    |                                                  |
| 1                | 4.4 (<8.7)                          | 69                      | 1.00 (-)               | 1.00 (-)                                         | 87                        | 1.00 (-)               | 1.00 (-)                                         | 156                                           | 1.00 (-)                           | 1.00 (-)                                         |
| 2                | 13.0 (8.7-17.3)                     | 55                      | 0.72 (0.50, 1.02)      | 0.77 (0.54, 1.11)                                | 63                        | 0.71 (0.51, 0.98)      | 0.77 (0.55, 1.06)                                | 118                                           | 0.72 (0.56, 0.91)                  | 0.78 (0.61, 0.99)                                |
| 3                | 22.9 (17.4-30.9)                    | 80                      | 0.93 (0.67, 1.28)      | 1.03 (0.74, 1.42)                                | 67                        | 0.71 (0.52, 0.98)      | 0.81 (0.59, 1.12)                                | 147                                           | 0.82 (0.65, 1.02)                  | 0.92 (0.73, 1.16)                                |
| 4                | 45.1 (≥31.0)                        | 77                      | 0.78 (0.56, 1.08)      | 0.86 (0.62, 1.20)                                | 75                        | 0.74 (0.54, 1.01)      | 0.83 (0.61, 1.14)                                | 152                                           | 0.75 (0.60, 0.94)                  | 0.84 (0.67, 1.06)                                |
|                  | <i>p</i> -trend <sup>4</sup>        |                         | 0.3                    | 0.6                                              |                           | 0.1                    | 0.4                                              |                                               | 0.07                               | 0.4                                              |
| Flavones         |                                     |                         |                        |                                                  |                           |                        |                                                  |                                               |                                    |                                                  |
| 1                | 0.4 (<0.6)                          | 100                     | 1.00 (-)               | 1.00 (-)                                         | 76                        | 1.00 (-)               | 1.00 (-)                                         | 176                                           | 1.00 (-)                           | 1.00 (-)                                         |
| 2                | 0.8 (0.6-1.0)                       | 53                      | 0.57 (0.41, 0.79)      | 0.61 (0.44, 0.85)                                | 88                        | 1.13 (0.83, 1.54)      | 1.23 (0.90, 1.67)                                | 141                                           | 0.82 (0.66, 1.02)                  | 0.89 (0.71, 1.11)                                |
| 3                | 1.4 (1.1-1.7)                       | 67                      | 0.68 (0.50, 0.93)      | 0.76 (0.56, 1.04)                                | 65                        | 0.89 (0.64, 1.25)      | 1.03 (0.74, 1.44)                                | 132                                           | 0.76 (0.61, 0.95)                  | 0.87 (0.69, 1.09)                                |
| 4                | 2.7 (≥1.8)                          | 61                      | 0.61 (0.44, 0.84)      | 0.70 (0.50, 0.97)                                | 63                        | 0.94 (0.67, 1.31)      | 1.12 (0.79, 1.57)                                | 124                                           | 0.74 (0.59, 0.93)                  | 0.88 (0.69, 1.11)                                |
|                  | <i>p</i> -trend <sup>4</sup>        |                         | 0.02                   | 0.1                                              |                           | 0.4                    | 0.8                                              |                                               | 0.02                               | 0.3                                              |
| Flavonols        |                                     |                         |                        |                                                  |                           |                        |                                                  |                                               |                                    |                                                  |
| 1                | 7.3 (<9.2)                          | 87                      | 1.00 (-)               | 1.00 (-)                                         | 84                        | 1.00 (-)               | 1.00 (-)                                         | 171                                           | 1.00 (-)                           | 1.00 (-)                                         |
| 2                | 11.0 (9.2-12.9)                     | 67                      | 0.65 (0.47, 0.89)      | 0.71 (0.51, 0.98)                                | 62                        | 0.79 (0.57, 1.10)      | 0.86 (0.62, 1.19)                                | 129                                           | 0.73 (0.58, 0.92)                  | 0.80 (0.63, 1.00)                                |
| 3                | 15.3 (13.0-18.6)                    | 62                      | 0.60 (0.43, 0.83)      | 0.68 (0.49, 0.94)                                | 68                        | 0.87 (0.63, 1.19)      | 0.97 (0.70, 1.33)                                | 130                                           | 0.73 (0.58, 0.92)                  | 0.83 (0.66, 1.04)                                |
| 4                | 25.0 (≥18.7)                        | 65                      | 0.67 (0.48, 0.92)      | 0.74 (0.53, 1.03)                                | 78                        | 0.99 (0.73, 1.35)      | 1.11 (0.82, 1.52)                                | 143                                           | 0.83 (0.66, 1.03)                  | 0.93 (0.74, 1.16)                                |
|                  | <i>p</i> -trend <sup>4</sup>        |                         | 0.05                   | 0.2                                              |                           | 0.7                    | 0.3                                              |                                               | 0.3                                | 0.9                                              |

**Supplemental Table 2 (continued). Rate ratios (RR) and confidence intervals (CI) of stroke mortality by quartile of energy-adjusted flavonoid intake among men and women in the CPS II Nutrition cohort, 1999-2006.**

| <b>Flavonoid</b>             |                                     | <b>Men (n = 38,180)</b> |                        |                                                  | <b>Women (n = 60,289)</b> |                        |                                                  | <b>Men and Women (n = 98,469)<sup>1</sup></b> |                                    |                                                  |
|------------------------------|-------------------------------------|-------------------------|------------------------|--------------------------------------------------|---------------------------|------------------------|--------------------------------------------------|-----------------------------------------------|------------------------------------|--------------------------------------------------|
| <b>Quartile</b>              | <b>Median Intake (Range) (mg/d)</b> | <b>Deaths (n)</b>       | <b>Age-adjusted RR</b> | <b>Multivariate-adjusted RR (CI)<sup>2</sup></b> | <b>Deaths (n)</b>         | <b>Age-adjusted RR</b> | <b>Multivariate-adjusted RR (CI)<sup>2</sup></b> | <b>Deaths (n)</b>                             | <b>Age-adjusted RR<sup>3</sup></b> | <b>Multivariate-adjusted RR (CI)<sup>2</sup></b> |
| Proanthocyanidins            |                                     |                         |                        |                                                  |                           |                        |                                                  |                                               |                                    |                                                  |
| 1                            | 57.9 (<80.9)                        | 80                      | 1.00 (-)               | 1.00 (-)                                         | 82                        | 1.00 (-)               | 1.00 (-)                                         | 162                                           | 1.00 (-)                           | 1.00 (-)                                         |
| 2                            | 104.3 (80.9-131.9)                  | 60                      | 0.63 (0.45, 0.88)      | 0.66 (0.47, 0.92)                                | 59                        | 0.74 (0.53, 1.04)      | 0.80 (0.57, 1.12)                                | 119                                           | 0.69 (0.54, 0.87)                  | 0.73 (0.57, 0.92)                                |
| 3                            | 168.3 (132.0-221.8)                 | 80                      | 0.83 (0.61, 1.14)      | 0.87 (0.64, 1.20)                                | 66                        | 0.78 (0.56, 1.08)      | 0.84 (0.61, 1.18)                                | 146                                           | 0.81 (0.65, 1.02)                  | 0.87 (0.69, 1.09)                                |
| 4                            | 334.2 (≥221.9)                      | 61                      | 0.68 (0.49, 0.95)      | 0.70 (0.50, 0.99)                                | 85                        | 0.95 (0.70, 1.28)      | 1.04 (0.76, 1.41)                                | 146                                           | 0.82 (0.65, 1.02)                  | 0.88 (0.70, 1.10)                                |
| <i>p</i> -trend <sup>4</sup> |                                     |                         | 0.1                    | 0.2                                              |                           | 0.7                    | 0.4                                              |                                               | 0.5                                | 0.8                                              |
| Isoflavones                  |                                     |                         |                        |                                                  |                           |                        |                                                  |                                               |                                    |                                                  |
| 1                            | 0.025 (<0.028)                      | 57                      | 1.00 (-)               | 1.00 (-)                                         | 82                        | 1.00 (-)               | 1.00 (-)                                         | 139                                           | 1.00 (-)                           | 1.00 (-)                                         |
| 2                            | 0.031 (0.028-0.035)                 | 69                      | 0.89 (0.62, 1.27)      | 0.93 (0.65, 1.32)                                | 70                        | 0.91 (0.66, 1.26)      | 0.94 (0.68, 1.31)                                | 139                                           | 0.93 (0.73, 1.18)                  | 0.97 (0.77, 1.23)                                |
| 3                            | 0.045 (0.036-0.068)                 | 90                      | 0.86 (0.62, 1.20)      | 0.90 (0.64, 1.26)                                | 78                        | 1.26 (0.92, 1.73)      | 1.31 (0.96, 1.80)                                | 168                                           | 1.06 (0.84, 1.33)                  | 1.10 (0.88, 1.39)                                |
| 4                            | 0.567 (≥0.069)                      | 65                      | 0.69 (0.48, 0.98)      | 0.75 (0.53, 1.08)                                | 62                        | 1.13 (0.81, 1.58)      | 1.29 (0.92, 1.81)                                | 127                                           | 0.90 (0.70, 1.14)                  | 1.00 (0.78, 1.28)                                |
| <i>p</i> -trend <sup>4</sup> |                                     |                         | 0.05                   | 0.1                                              |                           | 0.5                    | 0.2                                              |                                               | 0.3                                | 0.8                                              |

<sup>1</sup>No heterogeneity in RRs by sex, tested using Likelihood Ratio Tests of models with and without an interaction term of flavonoid/s (quintiles) and sex.

<sup>2</sup>Multivariate model adjusted for age, smoking, beer and liquor intake, history of hypertension, history of cholesterol, family history of myocardial infarction, BMI, physical activity, energy intake, aspirin use, hormone replacement therapy (in women only), and gender (in combined model only) using Cox Proportional Hazards regression.

<sup>3</sup>Age-adjusted models for men and women combined were additionally adjusted for sex.

<sup>4</sup>Test for trend using median value for each quintile and modeling as a continuous variable.
